# Supplementary material
Source: PubMed Central journal article supplement (PMC4717514)
Supplement: NIHMS64594-supplement-Supplemental_Digital_Content__Including_Separate_Legend_.pdf [file NIHMS64594-supplement-Supplemental_Digital_Content__Including_Separate_Legend_.pdf]

## Supplemental Digital Content: Molecular Epidemiology of Group A

### Streptococcus Infections in Cambodian Children, 2007 - 2012

Paul Turner, Pises Ngeth, Claudia Turner, Sena Sao, Nicholas P.J. Day, Ciara

Baker, Andrew C. Steer, Pierre R. Smeesters

#### ***emm*-clusters and -types of the GAS isolates characterized in the study**

| <b><i>emm</i>-cluster</b> | <b>Isolates (n)</b> | <b><i>emm</i>-types (n)</b>                                                               |
|---------------------------|---------------------|-------------------------------------------------------------------------------------------|
| E3                        | 31                  | 9 (4), 25 (4), 44 (14), 58 (1), 58.8 (1), 82.1 (1), 87 (2), 103 (2), 113 (2)              |
| D4                        | 29                  | 33 (1), 41.2 (1), 53 (3), 56 (2), 70 (2), 86.2 (6), 93 (1), 116.1 (1), 119.2 (8), 230 (4) |
| E6                        | 25                  | 11 (3), 42 (4), 63 (4), 63.3 (1), 67 (2), 75.3 (4), 81.1 (5), 81.2 (1), 85 (1)            |
| E4                        | 21                  | 22 (2), 77 (4), 88.5 (1), 89.14 (6), 102.2 (3), 109.1 (3), 124 (1) 175.1 (1)              |
| A-C3                      | 12                  | 238.1 (11), 239 (1)                                                                       |
| E2                        | 11                  | 68 (1), 76 (5), 92 (2), 106 (1), 110 (2)                                                  |
| E1                        | 5                   | 4.2 (1), 4.5 (1), 60.4 (1), 78.3 (2)                                                      |
| M55                       | 5                   | 55 (5)                                                                                    |
| D2                        | 3                   | 71 (2), 115 (1)                                                                           |
| M74                       | 3                   | 74 (3)                                                                                    |
| A-C4                      | 1                   | 39.4 (1)                                                                                  |
| D5                        | 1                   | 97.1 (1)                                                                                  |
| M105                      | 1                   | 105 (1)                                                                                   |
| Non-typeable              | 2                   | Not able to be <i>emm</i> -typed (2)                                                      |
